# Supplementary material
Source: PubMed Central journal article supplement (PMC2765231)

**Supplementary Figure #1: Percent of Proteins by Number of predicted TMDs (TMHMM) for MudPITs**

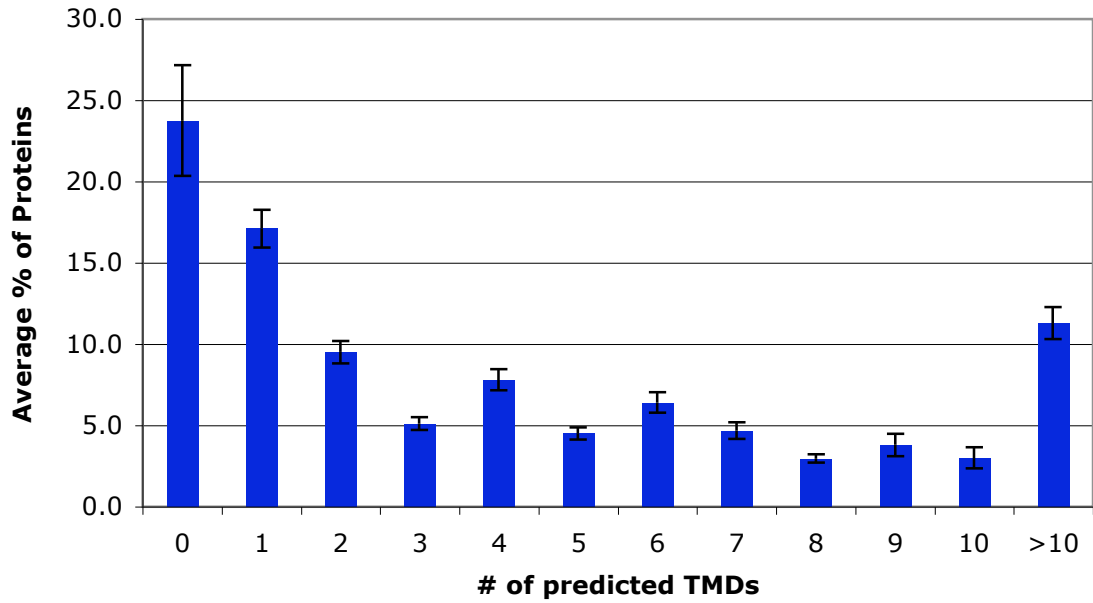

**Supplementary Figure #2: Average Percent of Peptides vs GRAVY Score for MudPITs**

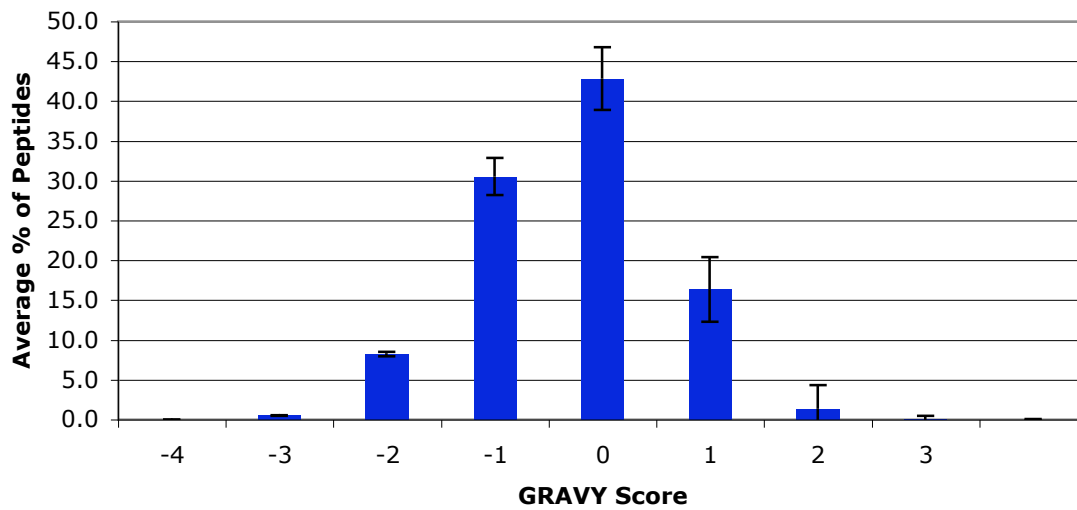

**Supplementary Figure #3: Percent of Amino Acids per Peptide Overlapping with a Predicted TMD (TMHMM) for MudPITs**

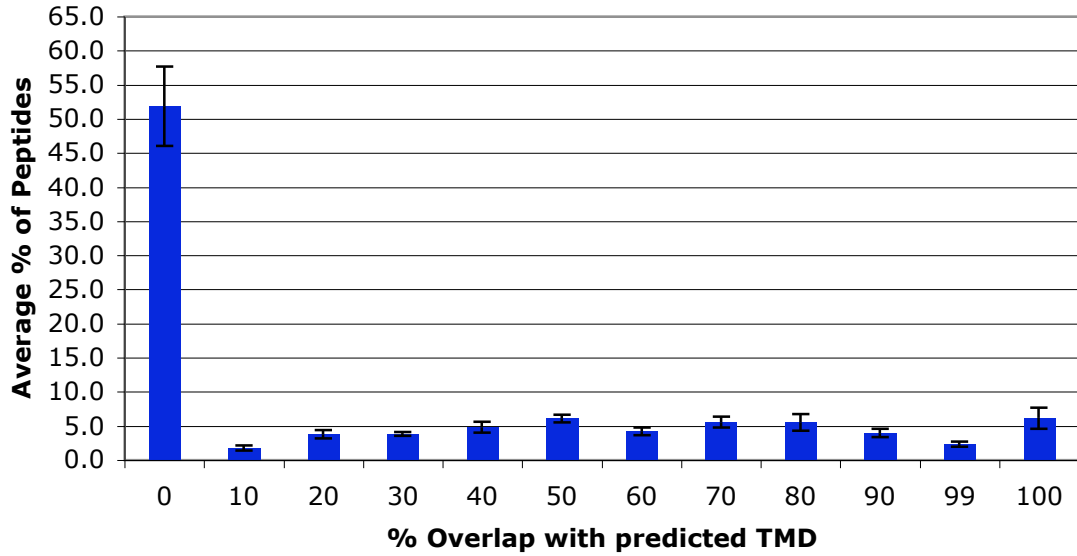

**Supplementary Figure 4A: Average spectra per protein for all proteins, integral membrane proteins and soluble proteins**

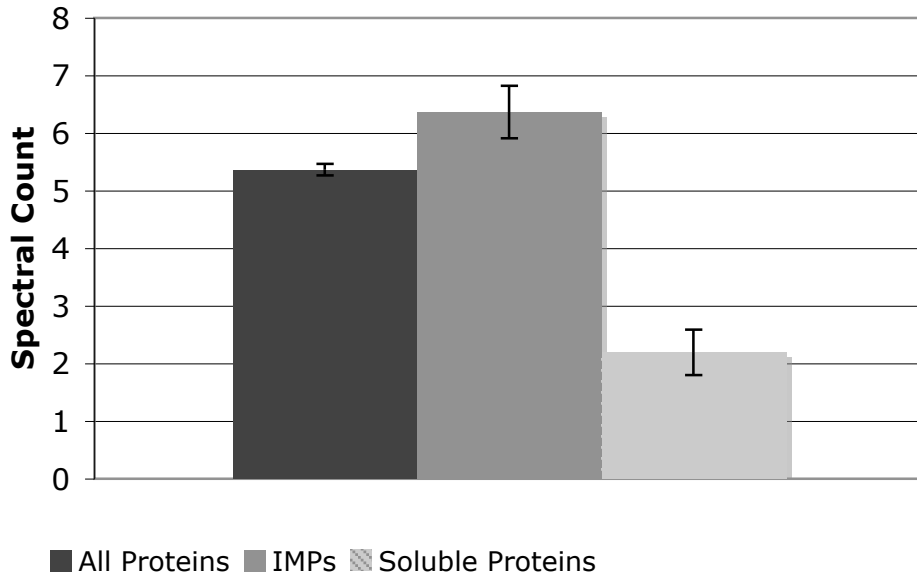

**Supplementary Figure 4B: Average Percent Sequence Coverage for Identified Membrane and Soluble Proteins**

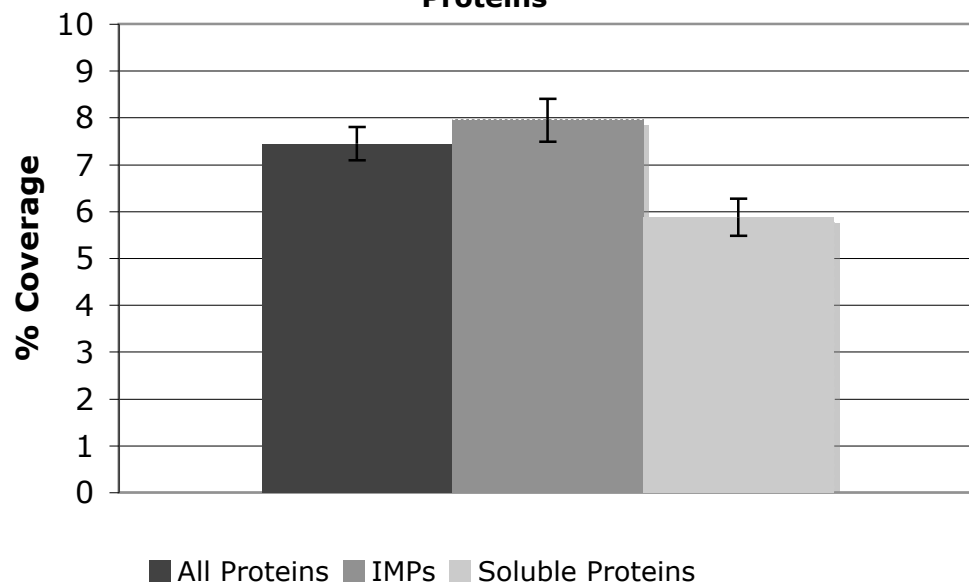

Supplement: NIHMS135295-supplement-SuppFigures.pdf [file NIHMS135295-supplement-SuppFigures.pdf]
